# Supplementary material for: Effect of collagen sponge incorporating Macrotyloma uniflorum extract on full-thickness wound healing by down-regulation of matrix metalloproteinases and inflammatory markers
Source: Royal Society of Chemistry journal article supplement (doi:10.1039/c4ra11959b), 2014-01-01
Supplement: c4ra11959b1.pdf [file c4ra11959b1.pdf]

## Electronic Supplementary Information C4RA11959B

Table S1: Animal grouping

| Sample collection days | No. of animals used for gross, biochemical and histological analysis |          |           |          |
|------------------------|----------------------------------------------------------------------|----------|-----------|----------|
|                        | Group I                                                              | Group II | Group III | Group IV |
|                        | Control                                                              | CS       | CSM       | CSPE     |
| 4th                    | 6                                                                    | 6        | 6         | 6        |
| 8th                    | 6                                                                    | 6        | 6         | 6        |
| 12th                   | 6                                                                    | 6        | 6         | 6        |
| 16th                   | 6                                                                    | 6        | 6         | -        |
| 20th                   | 6                                                                    | 6        | -         | -        |
